# Supplementary material for: Catalyst-TiO(OH)2 could drastically reduce the energy consumption of CO2 capture
Source: PubMed Central journal article supplement (PMC6039475; doi:10.1038/s41467-018-05145-0), 2018-07-10
Supplement: 41467_2018_5145_MOESM1_ESM.pdf [file 41467_2018_5145_MOESM1_ESM.pdf]

Supplementary Information for

**Catalyst-TiO(OH)<sub>2</sub> could drastically reduce the energy consumption  
of CO<sub>2</sub> capture**

Qinghua Lai, Sam Toan, Mohammed A. Assiri, Huaigang Cheng, Armistead G Russell, Hertanto  
Adidharma, Maciej Radosz, Maohong Fan\*

\*Corresponding author. Email: [mfan@uwyo.edu](mailto:mfan@uwyo.edu) and [mfan3@mail.gatech.edu](mailto:mfan3@mail.gatech.edu).

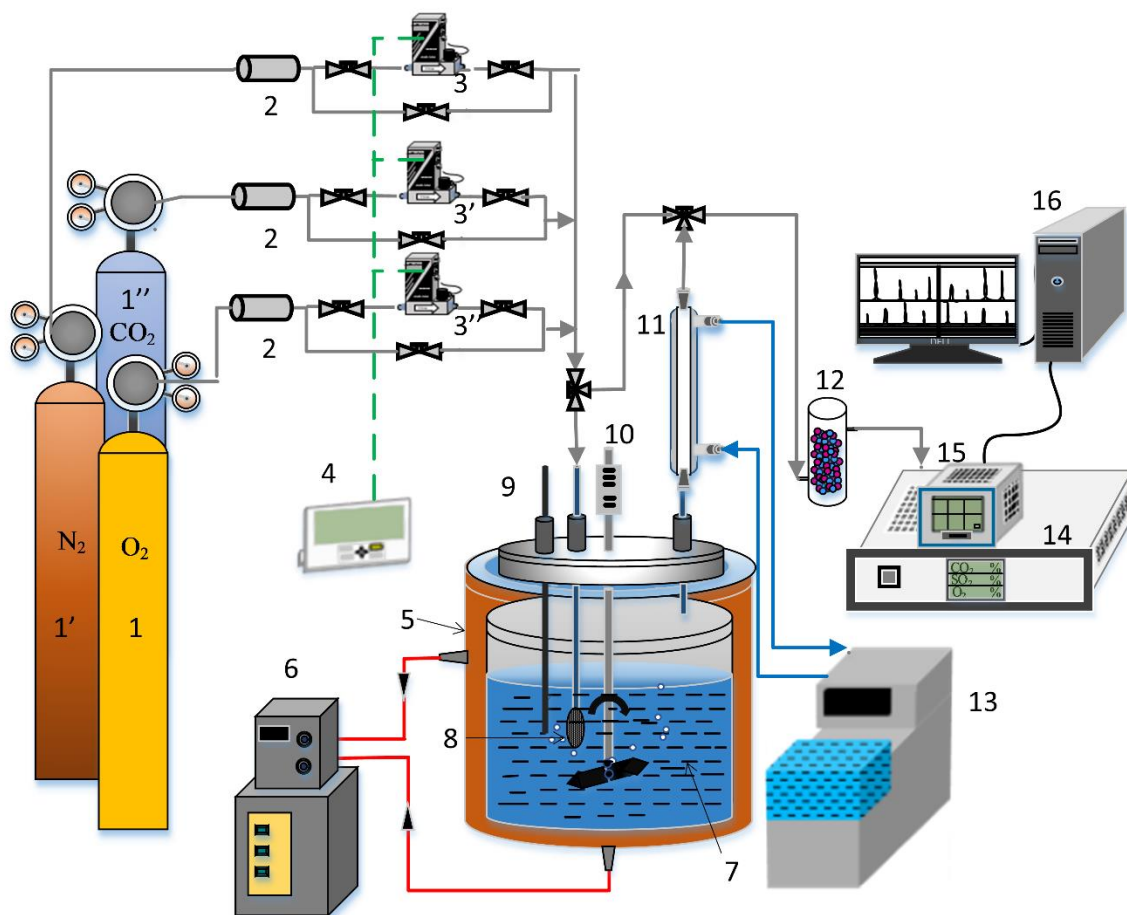

**Supplementary Figure 1.** Schematic drawing of MEA CO<sub>2</sub> absorption/desorption experimental setup. 1, 1, 1'': gas cylinders; 2: filter; 3: mass flow controller; 4: mass flow controller control module; 5: furnace; 6: thermostatic water bath; 7: catalyst suspended in the solvent; 8: muffle for inlet gas; 9: thermocouple; 10: mechanical stirrer; 11: condenser; 12: moisture remover; 13: cooling unit; 14: gas analyzer; 15: data recorder; 16: computer.

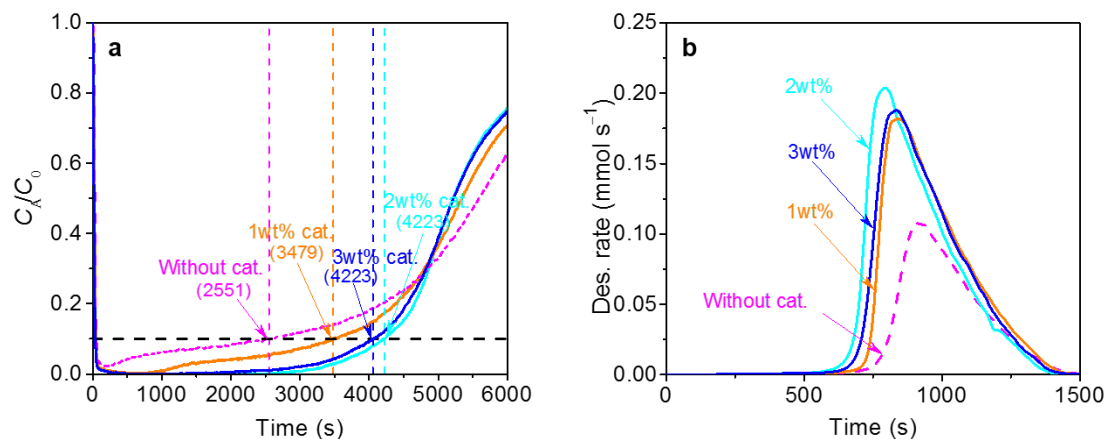

**Supplementary Figure 2.** Effect of  $\text{TiO}(\text{OH})_2$  catalyst (cat.) concentration on uncatalyzed and catalyzed  $\text{CO}_2$  absorption (abs.) and desorption (des.). **a**  $\text{CO}_2$  absorption profiles of 20 wt% MEA sorbent. **b**  $\text{CO}_2$  desorption rate of spent 20 wt% MEA sorbent.

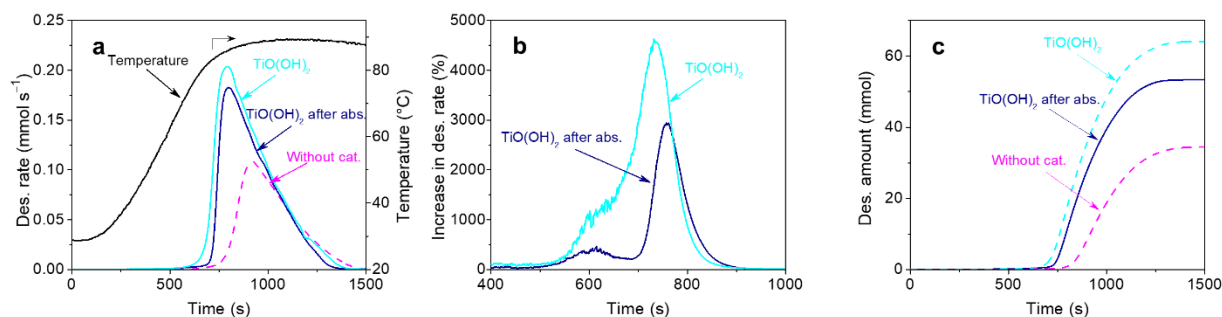

**Supplementary Figure 3.** Effect of addition of  $\text{TiO}(\text{OH})_2$  before and after absorption step on catalyzed  $\text{CO}_2$  desorption. **a** The rates of  $\text{CO}_2$  desorption from spent 20 wt% MEA sorbent without and with addition of  $\text{TiO}(\text{OH})_2$  before and after absorption step. **b** The percentage increases in  $\text{CO}_2$  desorption rate due to the addition of  $\text{TiO}(\text{OH})_2$  before and after absorption step. **c** Effects of addition of  $\text{TiO}(\text{OH})_2$  before and after absorption step on the quantities of desorbed  $\text{CO}_2$ .

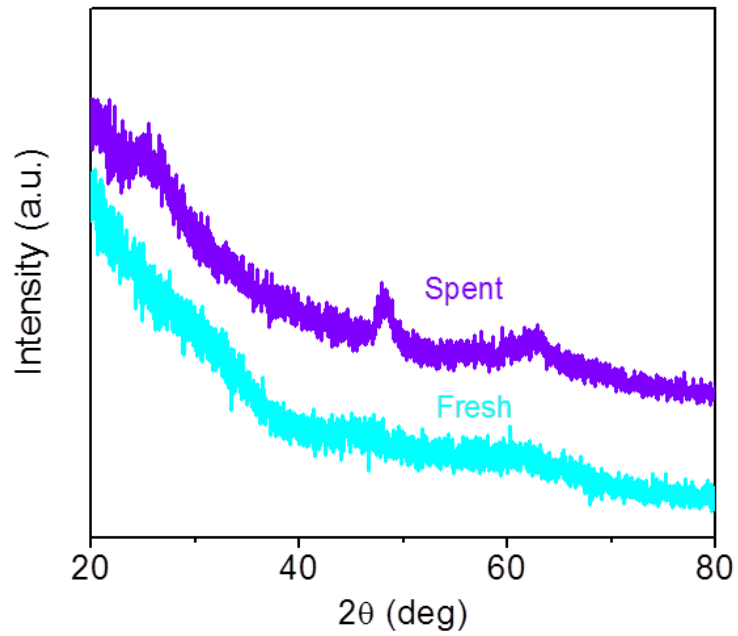

**Supplementary Figure 4.** XRD results of the fresh and used  $\text{TiO}(\text{OH})_2$ .

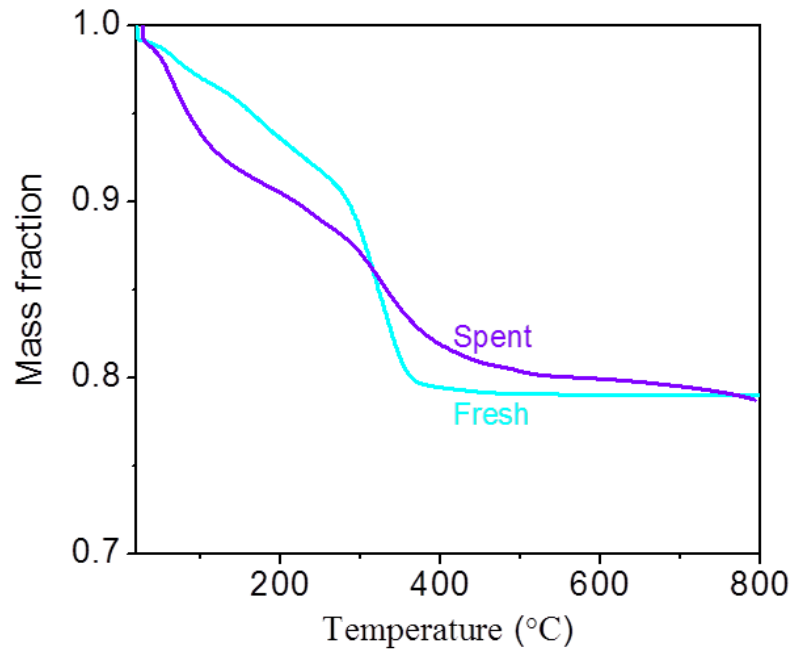

**Supplementary Figure 5.** TGA profiles of fresh and used  $\text{TiO}(\text{OH})_2$ .

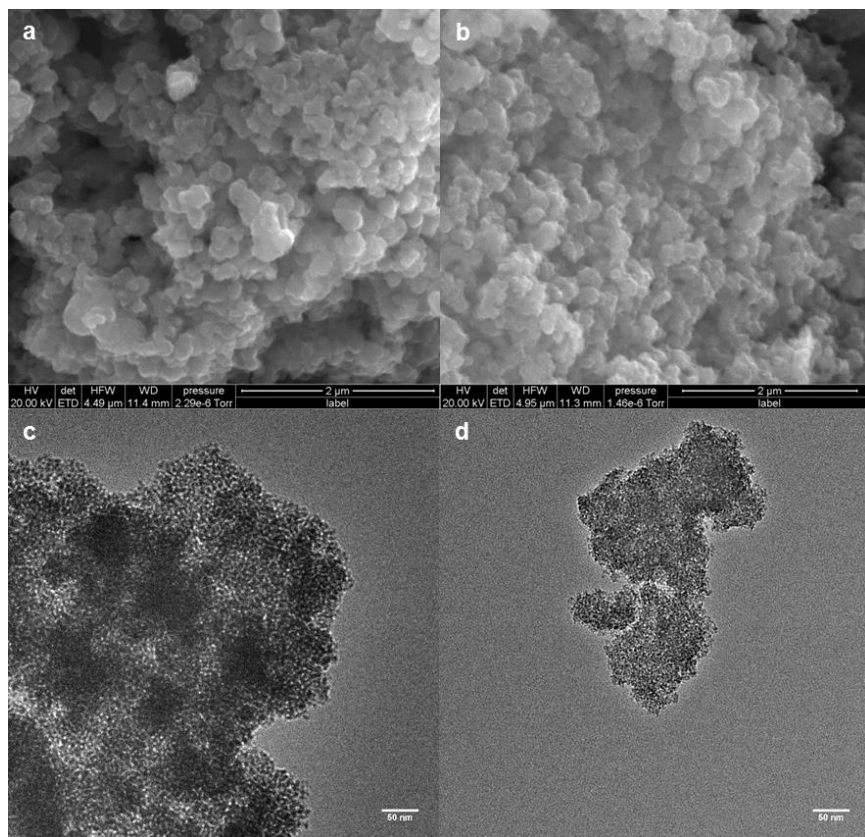

**Supplementary Figure 6.** Morphologies of fresh and used  $\text{TiO(OH)}_2$ . **a** SEM images of fresh and **b** used  $\text{TiO(OH)}_2$ . **c** TEM images of fresh and **d** used  $\text{TiO(OH)}_2$ .

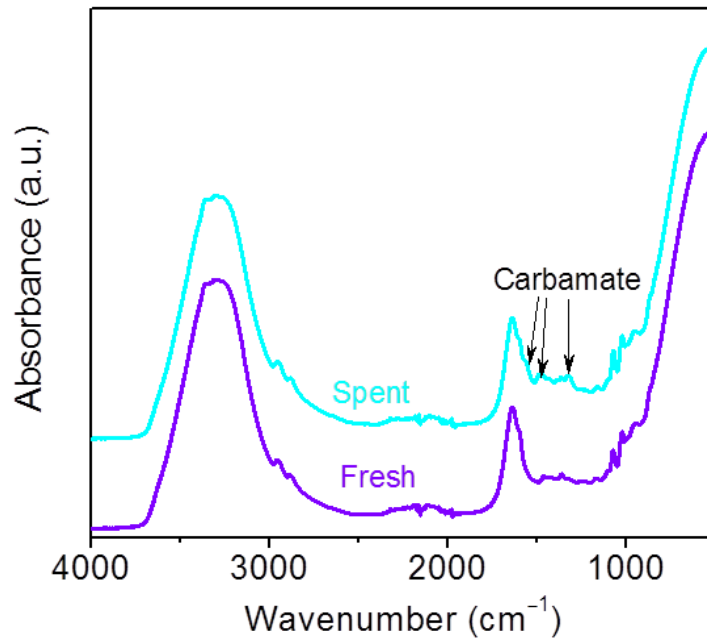

**Supplementary Figure 7.** FT-IR spectra of fresh and spent MEA sorbents.

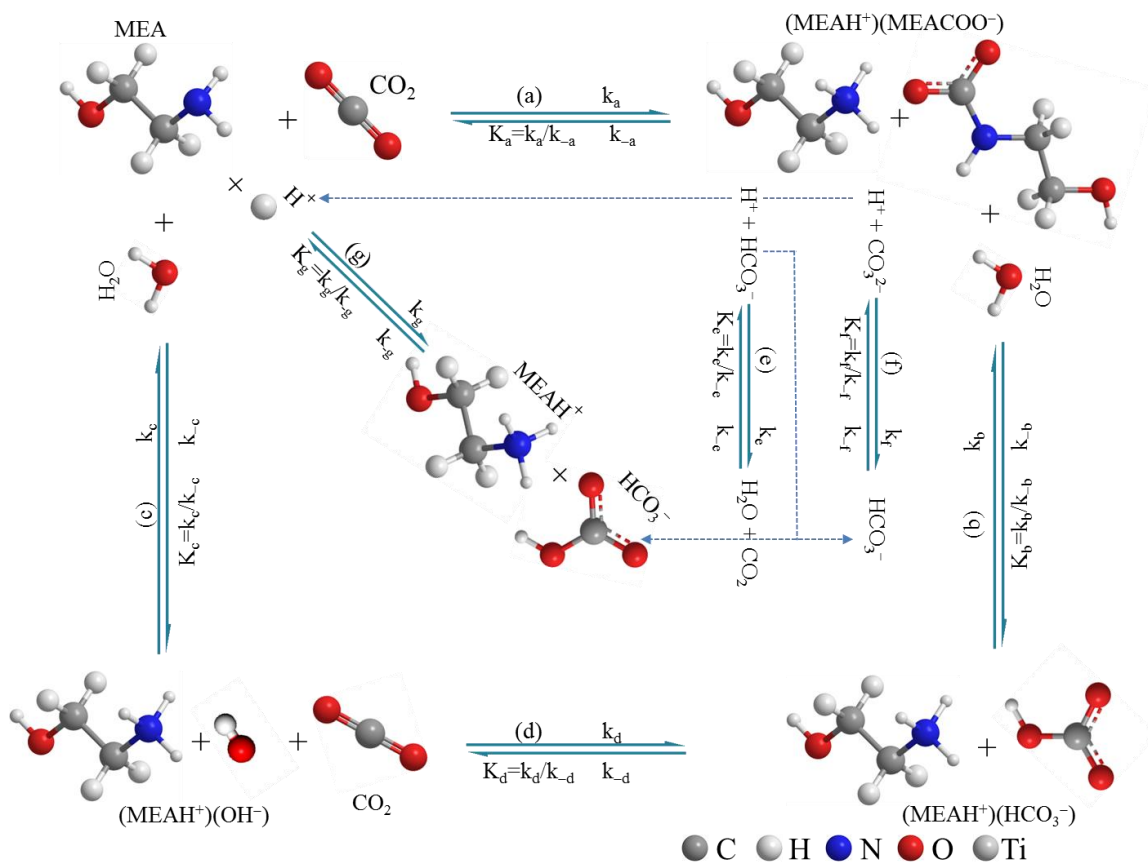

**Supplementary Figure 8.** Reaction pathways for uncatalyzed CO<sub>2</sub> absorption and desorption with MEA solution.

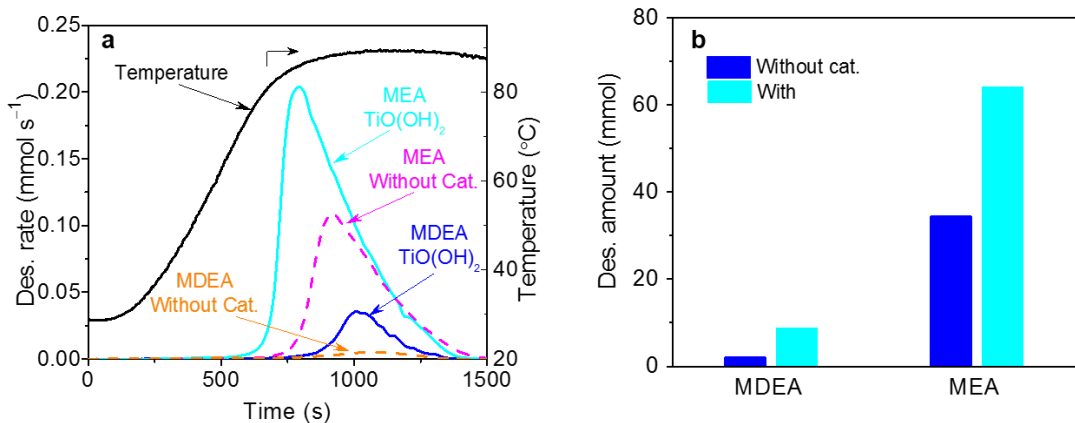

**Supplementary Figure 9.** CO<sub>2</sub> desorption amount of different 20 wt% amine-based sorbents with and without TiO(OH)<sub>2</sub>. **a** CO<sub>2</sub> desorption rate. **b** CO<sub>2</sub> desorption amount.

**Supplementary Table 1.** Desorption rate, time, and temperature at maximum CO<sub>2</sub> desorption point.

| MEA solvents                        | Maximum CO <sub>2</sub> des. rate (mmol s <sup>-1</sup> ) | Time at maximum CO <sub>2</sub> des. rate (s) | Temperature at maximum CO <sub>2</sub> des. rate (°C) |
|-------------------------------------|-----------------------------------------------------------|-----------------------------------------------|-------------------------------------------------------|
| Without Cat.                        | 0.109                                                     | 940                                           | 88.2                                                  |
| With TiO <sub>2</sub>               | 0.107                                                     | 898                                           | 88.0                                                  |
| With silica gel                     | 0.133                                                     | 910                                           | 88.2                                                  |
| With HZSM-5                         | 0.133                                                     | 839                                           | 87.0                                                  |
| With TiO(OH) <sub>2</sub>           | 0.204                                                     | 792                                           | 85.8                                                  |
| Add TiO(OH) <sub>2</sub> after abs. | 0.183                                                     | 797                                           | 85.8                                                  |

**Supplementary Table 2.** CO<sub>2</sub> loading before and after desorption step.

| MEA solvents                        | CO <sub>2</sub> loading after ads. step (mol CO <sub>2</sub> mol <sup>-1</sup> MEA) | CO <sub>2</sub> loading after des. step (mol CO <sub>2</sub> mol <sup>-1</sup> MEA) | sorbent cyclic capacity (mol CO <sub>2</sub> mol <sup>-1</sup> MEA) |
|-------------------------------------|-------------------------------------------------------------------------------------|-------------------------------------------------------------------------------------|---------------------------------------------------------------------|
| Without Cat.                        | 0.520                                                                               | 0.467                                                                               | 0.0527                                                              |
| With TiO <sub>2</sub>               | 0.519                                                                               | 0.469                                                                               | 0.0497                                                              |
| With silica gel                     | 0.518                                                                               | 0.462                                                                               | 0.0563                                                              |
| With HZSM-5                         | 0.522                                                                               | 0.462                                                                               | 0.0599                                                              |
| With TiO(OH) <sub>2</sub>           | 0.541                                                                               | 0.443                                                                               | 0.0979                                                              |
| Add TiO(OH) <sub>2</sub> after abs. | 0.520                                                                               | 0.438                                                                               | 0.0817                                                              |

**Supplementary Table 3.** BET analysis results of fresh and used TiO(OH)<sub>2</sub>.

| Samples                    | Specific surface area (m <sup>2</sup> g <sup>-1</sup> ) | Pore volume (cm <sup>3</sup> g <sup>-1</sup> ) | Pore diameter (Å) |
|----------------------------|---------------------------------------------------------|------------------------------------------------|-------------------|
| Fresh TiO(OH) <sub>2</sub> | 783.2                                                   | 0.573                                          | 17.1              |
| HZSM-5                     | 580.6                                                   | 0.122                                          | 19.1              |
| TiO <sub>2</sub>           | 48.44                                                   | 0.084                                          | 15.3              |
| Silica gel                 | 532.8                                                   | 0.760                                          | 24.4              |
